# Supplementary material for: Monitoring of Microbial Contamination of Groundwater in the Upper Choluteca River Basin, Honduras
Source: MDPI journal article supplement (doi:10.3390/w15112116), 2023-06-02
Supplement: s1 [file s1]

**Table S1.** Primer sequences for classifying *E. coli* strains into phylogroups, PCR conditions and amplicon sizes.

| Primer Name | Primer Sequences               | Target Gene    | Annealing Temperature (°C) | Size of PCR Product (bp) | Reference                |
|-------------|--------------------------------|----------------|----------------------------|--------------------------|--------------------------|
| chuA.1b     | 5'-ATGGTACCGGACGAACCAAC-3'     | <i>chuA</i>    | 59                         | 288                      | Clermont et al 2013 [31] |
| chuA.2      | 5'-TGCCGCCAGTACCAAAGACA-3'     |                |                            |                          |                          |
| yjaA.1b     | 5'-CAAACGTGAAGTGTGTCAGGAG-3'   | <i>yjaA</i>    | 59                         | 211                      | Clermont et al 2000 [44] |
| yjaA.2b     | 5'-AATGCGTTCCTCAACCTGTG-3'     |                |                            |                          |                          |
| TspE4C2.1b  | 5'-CACTATTCGTAAGGTCATCC-3'     | <i>TspE4C2</i> | 59                         | 152                      | Clermont et al 2013 [31] |
| TspE4C2.2b  | 5'-AGTTTATCGCTGCGGGTCGC-3'     |                |                            |                          |                          |
| AceK.f      | 5'-AACGCTATTCGCCAGCTTGC-3'     | <i>arpA</i>    | 59                         | 400                      | Clermont et al 2013 [31] |
| ArpA1.r     | 5'-TCTCCCCATACCGTACGCTA-3'     |                |                            |                          |                          |
| ArpAgpE.f   | 5'-GATTCCATCTTGTCAAAATATGCC-3' | <i>arpA</i>    | 57                         | 301                      | Lescat et al 2013 [47]   |
| ArpAgpE.r   | 5'-GAAAAGAAAAAGAATTCCCAAGAG-3' |                |                            |                          |                          |
| trpAgpC.1   | 5'-AGTTTTATGCCCAGTGCGAG-3'     | <i>trpA</i>    | 57                         | 219                      | Lescat et al 2013 [47]   |
| trpAgpC.2   | 5'-TCTGCGCCGGTCACGCCC-3'       |                |                            |                          |                          |
| trpBA.f     | 5'-CGGCGATAAAGACATCTTCAC-3'    | <i>trpA</i>    | 57                         | 489                      | Clermont et al 2008 [48] |
| trpBA.r     | 5'-GCAACGCGGCCTGGCGGAAG-3'     |                |                            |                          |                          |
| ybgD.1      | 5'-TATGCGGCTGATGAAGGATC-3'     | <i>ybgD</i>    | 57                         | 177                      | Clermont et al 2019 [32] |
| ybgD.2      | 5'-GTTGACTAAGCGCAGGTCGA-3'     |                |                            |                          |                          |
| cfaB.1      | 5'-CTAACGTGATGCTGCTCTG-3'      | <i>cfaB</i>    | 57                         | 384                      | Clermont et al 2019 [32] |
| cfaB.2      | 5'-TGCTAACTACGCCACGGTAG-3'     |                |                            |                          |                          |
